# Supplementary material for: Genetic engineering of a temperate phage-based delivery system for CRISPR/Cas9 antimicrobials against Staphylococcus aureus
Source: PubMed Central journal article supplement (PMC5359561; doi:10.1038/srep44929), 2017-03-21
Supplement: srep44929-s1.pdf [file srep44929-s1.pdf]

Genetic engineering of a temperature phage-based delivery system for CRISPR/Cas9 antimicrobials against *Staphylococcus aureus*

Bo Youn Moon<sup>1,2§</sup>, Joo Youn Park<sup>1§</sup>, Juw Won Park<sup>3</sup>, Justin A. Thornton<sup>4</sup>, Yong Ho Park<sup>2</sup>, Keun Seok Seo<sup>1\*</sup>

<sup>1</sup>Department of Basic Sciences, College of Veterinary Medicine, Mississippi State University, Mississippi State, MS 39762, United States

<sup>2</sup>Department of Microbiology, College of Veterinary Medicine and BK21 Program for Veterinary Science, Seoul National University, Seoul 151-742, South Korea

<sup>3</sup>Department of Computer Engineering and Computer Science, University of Louisville, KY 40208, United States

<sup>4</sup>Department of Biological Sciences, Mississippi State University, Mississippi State, MS 39762, United States

<sup>§</sup>Both authors equally contributed to the work.

\*Corresponding author

Correspondence and requests for materials should be addressed to Keun Seok Seo

e-mail) seo@cvm.msstate.edu

Tel) 1-662-325-1018

Fax) 1-662-325-1031

Supplemental Table 1. Bacterial strains and plasmids used in this study

| Strain                                            | Description                                                                                                               | Reference or source |
|---------------------------------------------------|---------------------------------------------------------------------------------------------------------------------------|---------------------|
| <i>Staphylococcus aureus</i>                      |                                                                                                                           |                     |
| RF122                                             | Bovine isolate, CC151, Lysogenized with $\phi$ SaBov                                                                      | <sup>1</sup>        |
| RF122 $\Delta$ nuc                                | The <i>nuc</i> gene deletion mutant of RF122                                                                              | This study          |
| RF122 $\Delta$ nuc $\phi$ SaBov-Cas9-nuc          | Integration of CRISPR-Cas9 system specific to the <i>nuc</i> gene into the genome of $\phi$ SaBov lysogenized in RF122    | This study          |
| RF122 $\Delta$ nuc $\phi$ SaBov-Cas9-null         | Integration of CRISPR-Cas9 system without spacer sequence into the genome of $\phi$ SaBov lysogenized in RF122            | This study          |
| RF122-19                                          | 10 cytotoxins and 11 superantigen gene deletions mutant of RF122                                                          | This study          |
| RF122-19 $\Delta$ nuc                             | The <i>nuc</i> gene deletion mutant of RF122-19                                                                           | This study          |
| RF122-19 $\Delta$ nuc $\phi$ SaBov-Cas9-nuc       | Integration of CRISPR-Cas9 system specific to the <i>nuc</i> gene into the genome of $\phi$ SaBov lysogenized in RF122-19 | This study          |
| RF122-19 $\Delta$ nuc $\phi$ SaBov-Cas9-null      | Integration of CRISPR-Cas9 system without spacer sequence into the genome of $\phi$ SaBov lysogenized in RF122-19         | This study          |
| RF122-19 $\Delta$ nuc $\phi$ SaBov-pTF11          | Complementation of $\phi$ 11 tail fiber protein gene in RF122-19 $\Delta$ nuc                                             | This study          |
| RF122-19 $\Delta$ nuc $\phi$ SaBov-Cas9-nuc-pTF11 | Complementation of $\phi$ 11 tail fiber protein gene in RF122-19 $\Delta$ nuc $\phi$ SaBov-Cas9-nuc                       | This study          |
| CTH96                                             | Bovine isolate, CC151, susceptible to $\phi$ SaBov                                                                        | <sup>2</sup>        |
| CTH96 $\Delta$ nuc                                | The <i>nuc</i> gene deletion mutant of CTH96                                                                              | This study          |
| CTH96pGFP                                         | Expression of green fluorescence protein on CTH96                                                                         | This study          |
| NRS382                                            | Human MRSA USA100, ST5                                                                                                    | <sup>3</sup>        |
| MN PE                                             | Human MRSA USA200, ST36                                                                                                   | <sup>4</sup>        |
| DAR1809                                           | Human MRSA USA300, ST8                                                                                                    | <sup>4</sup>        |
| MW2                                               | Human MRSA USA400, ST1                                                                                                    | <sup>5</sup>        |
| <i>Escherichia coli</i>                           |                                                                                                                           |                     |
| DH5 $\alpha$                                      | Cloning host of pMAD and pMK4                                                                                             | Life Technologies   |
| Top10                                             | Cloning host of pCR4                                                                                                      | Life Technologies   |
| Plasmid                                           | Description                                                                                                               | Reference           |
| Modified pMAD-secY                                | Temperature sensitive shuttle vector system                                                                               | This study          |

|           |                                                                                                                                                    |                   |
|-----------|----------------------------------------------------------------------------------------------------------------------------------------------------|-------------------|
| pCR4-TOPO | TA cloning vector                                                                                                                                  | Life Technologies |
| pMK4      | High copy number vector for complementary                                                                                                          | <sup>6</sup>      |
| pKS1      | Cloning of synthetic oligos containing a promoter, pre-crRNA, and two BbsI restriction sites flanked with a direct repeat (CRISPR array) into pMK4 | This study        |
| pKS2      | Cloning of the spacer sequence specific to the <i>nuc</i> gene into pKS1                                                                           | This study        |
| pKS3      | Cloning of a tracrRNA and Cas9 into modified pMAD-secY                                                                                             | This study        |
| pKS4      | Cloning of PCR product containing CRISPR array with spacer sequence specific to the <i>nuc</i> gene amplified from pKS2 into pKS3                  | This study        |
| pKS5      | Cloning of SAB1737 and SAB1738 into pKS4                                                                                                           | This study        |

---

Supplemental Table 2. Oligonucleotides used in this study

| Name                                                                                    | Sequences (5' to 3')                                                                                                                                                                                                                                                                                                                                                                                                            |
|-----------------------------------------------------------------------------------------|---------------------------------------------------------------------------------------------------------------------------------------------------------------------------------------------------------------------------------------------------------------------------------------------------------------------------------------------------------------------------------------------------------------------------------|
| Cloning of Cloning of CRISPR array containing a promoter, pre-crRNA, DR, and BbsI sites |                                                                                                                                                                                                                                                                                                                                                                                                                                 |
| CRISPR_f                                                                                | GATCCCGGCCGACGTGAACTATATGATTTCCGCAGTATA<br>TTTAGATGAAGATTATTTCTTAATAACTAAAAATATGGT<br>ATAATACTCTTAATAAATGCAGTAATACAGGGGCTTTTCA<br>AGACTGAAGTCTAGCTGAGACAAATAGTGCGATTACGAA<br>ATTTTTTAGACAAAAATAGTCTACGAGGTTTTAGAGCTAT<br>GCTGTTTTGAATGGTCCCAAACGGGTCTTCGATCGATCG<br>ATCGAAGACGTTTTAGAGCTATGCTGTTTTGAATGGTCCC<br>AAAACCTTGCAGGGG                                                                                                 |
| CRISPR_r                                                                                | AAT TCC CCT GCA AGG TTT TGG GAC CAT TCA AAA CAG<br>CAT AGC TCT AAA ACG TCT TCG ATC GAT CGA TCG AAG<br>ACC CGT TTT GGG ACC ATT CAA AAC AGC ATA GCT CTA<br>AAA CCT CGT AGA CTA TTT TTG TCT AAA AAA TTT CGT<br>AAT CGC ACT ATT TGT CTC AGC TAG ACT TCA GTC TTG<br>AAA AGC CCC TGT ATT ACT GCA TTT ATT AAG AGT ATT<br>ATA CCA TAT TTT TAG TTA TTA AGA AAT AAT CTT CAT<br>CTA AAA TAT ACT GCG GAA AAT CAT ATA GTT CAC GTC<br>GGC CGG |
| Cloning of spacer sequencing into pKS1                                                  |                                                                                                                                                                                                                                                                                                                                                                                                                                 |
| spacer-nucf                                                                             | AAACTGCAAAGAAAATTGAAGTCGAGTTTGACAAGT                                                                                                                                                                                                                                                                                                                                                                                            |
| spacer-nucr                                                                             | TAAACTTGTCAAACCTCGACTTCAATTTTCTTTGCA                                                                                                                                                                                                                                                                                                                                                                                            |
| spacer-esxAf                                                                            | AAACTGCACAAGGTGAAATTGCAGCGAACTGGGAGT                                                                                                                                                                                                                                                                                                                                                                                            |
| spacer-esxAr                                                                            | TAAACTCCCAGTTCGCTGCAATTTACCTTGTGCA                                                                                                                                                                                                                                                                                                                                                                                              |
| Cloning of trac-RNA and Cas9 into modified pMAD-secY                                    |                                                                                                                                                                                                                                                                                                                                                                                                                                 |
| tracrnaf                                                                                | GATCCTTAAGTGATCCCTTGAAAGATTCTGT                                                                                                                                                                                                                                                                                                                                                                                                 |
| cas9r                                                                                   | GATCCGGCCGTCAGTCACCTCCTAGCTGACTCA                                                                                                                                                                                                                                                                                                                                                                                               |
| Cloning of CRISPR array with a spacer sequence specific to the <i>nuc</i> into pKS3     |                                                                                                                                                                                                                                                                                                                                                                                                                                 |
| leaderf                                                                                 | GCAGGTCGACGGATCCCGGCCGACGTGAACTATATGATTT<br>TCCGC                                                                                                                                                                                                                                                                                                                                                                               |
| drr                                                                                     | AACGACGGCCAGTGAATTCCCCTGCAGGGTTTTGGGACCA<br>TTCAAAACAGCATAGCTCTAAAACGTCTTCGATCGATCGA<br>TCGAAGACCC                                                                                                                                                                                                                                                                                                                              |
| Cloning of SAB1737 and SAB1738 into pKS4                                                |                                                                                                                                                                                                                                                                                                                                                                                                                                 |
| 1737upf                                                                                 | GATCGTCGACTTATGCTTCACTCCATTTC                                                                                                                                                                                                                                                                                                                                                                                                   |
| 1737upr                                                                                 | GATCCTTAAGATGGGCAGTGTTGTAATTAT                                                                                                                                                                                                                                                                                                                                                                                                  |
| 1738dnf                                                                                 | GATCCCTGCAGGTGTTGTTGCATTAAATCACT                                                                                                                                                                                                                                                                                                                                                                                                |
| 1738dnr                                                                                 | GCGCAGATCTTGATATTTAGAGGTGGCACA                                                                                                                                                                                                                                                                                                                                                                                                  |
| Generating the <i>nuc</i> gene deletion mutant                                          |                                                                                                                                                                                                                                                                                                                                                                                                                                 |
| nucupf                                                                                  | GATCGTCGACGTTAACACTTTAAGCAAACCGCATC                                                                                                                                                                                                                                                                                                                                                                                             |
| nucupr                                                                                  | GATCACGCGTAACTAACACCTCTTTCTTTTGTAG                                                                                                                                                                                                                                                                                                                                                                                              |
| nucdnf                                                                                  | GATCGAATTCTGCTCATTGTAAAAGTGTCACTGCT                                                                                                                                                                                                                                                                                                                                                                                             |

|                                                                    |                                                       |
|--------------------------------------------------------------------|-------------------------------------------------------|
| nucdnr                                                             | GATCCCCGGGATACGTCGCTACCATCTTCT                        |
| Generating the <i>esxA</i> gene deletion mutant                    |                                                       |
| esxAupf                                                            | GATCGTCGACTGTGATAAGAGGCTGATC                          |
| esxAupr                                                            | GATCACGCGTCCCGTAAGATTGCGATTTTG                        |
| esxAdnf                                                            | GATCGAATTCGCAATTCACAACACTTAGTCC                       |
| esxAdnr                                                            | GATCCCCGGGGATTTATTGTATGTTTGGAAACC                     |
| Generating $\alpha$ -hemolysin ( <i>hla</i> ) deletion mutant      |                                                       |
| hlaupf                                                             | GCGCGGATCCTTACCTCATATAGTGTCATG                        |
| hlaupr                                                             | GCGCGTTCGACGAAAGGTACCATTGCTGGTC                       |
| hladnf                                                             | GCGCGAATTCGTCAATTTAGAATATTGCAG                        |
| hladnr                                                             | GCGCAGATCTAATGCCTCTAACTAAAAACC                        |
| Generating $\beta$ -hemolysin, leukocidin G/H deletion mutant      |                                                       |
| 1874f                                                              | GCGCGGATCCCTTAATTCCGATTACATTTG                        |
| 1874r                                                              | GCGCGTTCGACGTGCCTTTATTAACATTAAG                       |
| 1876f                                                              | GCGCGAATTCCTCAAGTCATTCGCAATAA                         |
| 1876r                                                              | GCGCAGATCTGTATCAACGATCTTATTAAC                        |
| Generating gamma hemolysin ACB deletion mutant                     |                                                       |
| hlgaupf                                                            | TAATGGATCCACCGTTGATTCTCAATCG                          |
| hlgaupr                                                            | TGAAGTCGACCATCTTAACAACACTAGGGC                        |
| hlgbdnf                                                            | GCGCGAATTCGGCTTTGTGAAACCTAATCC                        |
| hlgbdnr                                                            | GCGCAGATCTGGTCGTCACAATTACTGTTG                        |
| Generating leukocidin D/E ( <i>lukDE</i> ) deletion mutant         |                                                       |
| lukdeupf                                                           | GCGCGGATCCCGAATTTGGAGATGGCTGC                         |
| lukdeupr                                                           | GCGCGTTCGACCTAATCCTGGAGTATAACTG                       |
| lukdednf                                                           | TGATGAATTCCTATTGCCCGTTAAACGG                          |
| lukdenr                                                            | ATTGAGATCTCCTGTCGGTTTACTCATTG                         |
| Generating leukocidin M/F' ( <i>lukMF'</i> ) deletion mutant       |                                                       |
| lukmfupf                                                           | GCGCGGATCCTTCGTATAGGCTTTATAG                          |
| lukmfupr                                                           | GCGCGTTCGACCTCCAATGTTATATCCTA                         |
| lukmfdnf                                                           | GCGCGAATTCCTACTTCCTAGATACCGT                          |
| lukmfdnr                                                           | GCGCAGATCTGAATAGCTTAACAACGTA                          |
| Generating Enterotoxin gene cluster ( <i>egc</i> ) deletion mutant |                                                       |
| egcupf                                                             | TCTTGATACGTATTTGACACTTGC                              |
| egcupr                                                             | AGCTATACGAGTTTGATGGTTCTG                              |
| egcdnf                                                             | CAGAACCATCAAACCTCGTATAGCTAACTAAGCGACTCAG<br>ATAATAGAC |
| egcdnr                                                             | AGAGTTGTTACAGTCGCTACACC                               |
| Generating staphylococcal enterotoxin C deletion mutant            |                                                       |

|                                                                    |                                                         |
|--------------------------------------------------------------------|---------------------------------------------------------|
| secupf                                                             | ATGAATTC CTGTGGATTTAGAAATAAGG                           |
| secupr                                                             | CCAACATTCCCAAGAAGTATC                                   |
| secdnf                                                             | GATACTTCTTCTTGGGAATGTTGGAAGAATGGATAATGTT<br>AATCC       |
| secdnr                                                             | TTATCCATGGCAAGCATCAAAC                                  |
| Generating staphylococcal enterotoxin like toxin L deletion mutant |                                                         |
| selupf                                                             | GATATATTTGAAAGGTAAGTACTTCG                              |
| selupr                                                             | AGTGTAGTATTCCATATGAATGATGGT                             |
| seldnf                                                             | ACCATCATTCATATGGAATACTACACTATACAAAAGGTTA<br>TAGGAAGAGTT |
| seldnr                                                             | CAATTTCTACAGATATGACTCCC                                 |
| dself                                                              | GTCATGTTTTCGGTTGATAGG                                   |
| dselr                                                              | TGTACAAATGGACTTAAGATATAGCG                              |
| Generating toxic shock syndrome toxin deletion mutant              |                                                         |
| tstupf                                                             | GCGCGGATCC ACTACATGTACTTACCAATGCG                       |
| tstupr                                                             | GCGCGTCGACGCAGAAATTAATTAATTTACCACTTTTTTCT               |
| tstdnf                                                             | GCGCGAATTCCAAAGGGCTTACGATGAAAAATTTTCAT                  |
| tstdnr                                                             | GCGCAGATCTAACCAATTACCAAAATTCTCCATGC                     |
| Generating staphylococcal enterotoxin like toxin X deletion mutant |                                                         |
| selxupf                                                            | TGTCGATGCTATGGATAGTGAGG                                 |
| selxupr                                                            | TAATTACCTCCTTGATGTAAAGC                                 |
| selxdnf                                                            | GCTTTACATCAAGGAGGTAATTATATCGCTAATACTTTGA<br>AAGTTAGG    |
| selxdnr                                                            | TCAAATGTAGCAGTATACATTAATTGCG                            |
| Complementation of the tail fiber protein of $\phi 11$             |                                                         |
| synf                                                               | GCTACTGCAGATCCCATTATGCTTTGGCAG                          |
| synr                                                               | GGGTTTCACTCTCCTTCTACA                                   |
| $\phi 11$ tailf                                                    | AGGAGAGTGAAACCCATGTACAAAATAAAAGATGTTGAA<br>AC           |
| $\phi 11$ autor                                                    | GCTAGGATCCCTAACTGATTTCTCCCCATAAG                        |
| Confirmation of deleted cytotoxins and superantigens               |                                                         |
| lukdf                                                              | TTGCCAGTCAACTTCATAAGTAGATGT                             |
| lukdr                                                              | GCGCGTGGTAACTTTAACCC                                    |
| lukef                                                              | TTTTTTACCATCAGGCGTAACA                                  |
| luker                                                              | ACGAATGATTTGGCCATTCC                                    |
| lukmf                                                              | TGGAGGTAAATTCCAGTCAGCA                                  |
| lukmr                                                              | TGTCGCGATAAAAGACGGATT                                   |
| lukf f                                                             | ACTGGTGGATTGAACGGGTC                                    |
| lukf r                                                             | ATCCAGTGCAAGTTGTTCCAAA                                  |

|       |                                 |
|-------|---------------------------------|
| lukgf | GACTTTGCACCAAAAAATCAGGAT        |
| lukgr | AGGTGCATAATGTATTCCAGGTCT        |
| lukhf | GCGTCATCATTATCATGTGCAA          |
| lukhr | CAAGGCTCAATTCATTCAAATT          |
| hlgaf | CCAATCAGCGCCATCAATC             |
| hlgar | CCAGTTGGGTCTTGTGCAAAT           |
| hlgbf | CGTTGCTACTTCTATGGCAT            |
| hlgbr | ACATTGTATTTAGCTCCCCAA           |
| hlgcf | ATGTTAAAGCTATGCGATGGCC          |
| hlger | AAGAGGTGGTAACTCACTGTCTGGA       |
| hlaf  | TGTTTGTGTTTGGATGCTTTTCT         |
| hlar  | GGTTTAGCCTGGCCTTCAGC            |
| hlbf  | CACCTGTACTCGGCCGTTCT            |
| hlbr  | TATACATCCCATGGCTTAGGTTTTTC      |
| segf  | GGTAAACAATCGACAATAGACAATCACTT   |
| segr  | TCCAGATTCAAATGCAGAACCAT         |
| senf  | TGGACTGTATTTTGAAATAAATGTGT      |
| senr  | GCTCCCCTGAACCTTTTACGT           |
| seuf  | AGCGAGTGAATTCTCTGGTTTAAATG      |
| seur  | TTGTGCTGTTATGTTTTTCATATTGG      |
| seif  | TGGCATTGATTATAATGGTCCTTG        |
| seir  | GCCTTTACCAGTGTTATTATGACC        |
| semf  | TCAGTTTCGACAGTTTTGTTGT          |
| semr  | CAGCTCAAGAAATTGATACTAAATTAAGAAG |
| seof  | ACTACAGATAAAAAGAAAGTTACTGCAC    |
| seor  | CATCAATATGATAGTCTGATGAATCTATTG  |
| secf  | CAACCAGACCCTACGCCAGA            |
| secr  | TGTTATAAATTAATCATGTGCCAAAAA     |
| self  | TAATTATCAATGGCAAGCATCAAAC       |
| selr  | CACTCCCCTTATCAAAAACCGC          |
| tstf  | TGAATTTTTTTATCGTAAGCCCTTTG      |
| tstr  | GGAAATGGATATAAGTTCCTTCGCT       |
| selxf | TCAACACAAAATTCCTCAAGTGT         |
| selxr | GCGACTCTAATGTATATTTACCGCC       |

---

qRT-PCR

---

|        |                       |
|--------|-----------------------|
| qintf  | CATCACTGGTGGACGCTTTG  |
| qintr  | AATGCATCGAGCGCTTTTTTC |
| qcas9f | CGGAAGCGACTCGTCTCAA   |

|                  |                           |
|------------------|---------------------------|
| qcas9r           | CAAATACGATTCTTCCGACGTGTAT |
| q $\phi$ 11intf  | TCTTTCTGTTGACTATGCACGATCT |
| q $\phi$ 11intr  | TTTTGGCGTAATTGATAACTGCTT  |
| q $\phi$ nm1intf | TTCTGTTGGCTATGCACGATCT    |
| q $\phi$ nm1intr | TTTTGGCGTAATTGATAACTGCTT  |

---



**BamHI** **EagI** **Promoter**  
 5' -GATCCcggccgACGTGAAC TATATGATTTTCCGCAGTATATTTTAGATGAAGATTATTTTC  
 3' -GgcccggcTGCACTTGATATACTAAAAGGCGTCATATAAAATCTACTTCTAATAAAG  
  
 TTAATAACTAAAAATATGGTATAATACTCTTAATAAATGCAGTAATACAGGGGCTTTTCAAGA  
 AATTATTGATTTTTATACCATATTATGAGAATTATTTACGTCATTATGTCCCCGAAAAGTTCT  
**Leader sequence**  
 CTGAAGTCTAGCTGAGACAAATAGTGCGATTACGAAATTTTTTAGACAAAAATAGTCTACGAG  
 GACTTCAGATCGACTCTGTTTATCAGCTAATGCTTTAAAAAATCTGTTTTTATCAGATGCTC  
  
**Direct repeat (DR)** ↓ **BbsI** **BbsI**  
 GTTTTAGAGCTATGCTGTTTTGAATGGTCCCAAACGGgtcttcGATCGATCGATCgaagacG  
 CAAAATCTCGATACGACAAAAC TTACCAGGGTTTTGCCcagaagCTAGCTAGCTAGcttctgC  
  
↓ **Direct repeat (DR)** ↑  
 TTTTAGAGCTATGCTGTTTTGAATGGTCCCAAACcctgcaggGG-3'  
 AAAATCTCGATACGACAAAAC TTACCAGGGTTTTGggacgtccCCTTAA-5'  
↑ **SbfI** **EcoRI**

Supplemental Figure S1. Synthetic oligos containing the promoter, leader, and direct repeat (DR) sequence cloned in *BamHI*/*EcoRI* sites in the pMK4 plasmid to generate pKS1. The color scheme is matched in the Figure 1. The arrow indicates the cleavage site by the *BbsI* restriction enzyme.

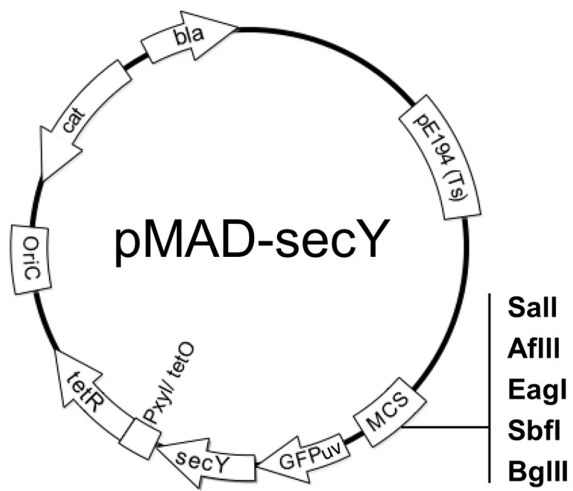

Supplemental Figure S2. A schematic map of modified pMAD-secY system. For an efficient screening process of double-crossover event, genes encoding chloramphenicol resistance (*cat*), anti-sense-secY controlled by tetracycline inducible promoter (*secY*), and green fluorescent protein UV variant (GFPuv) were added to the original pMAD system.

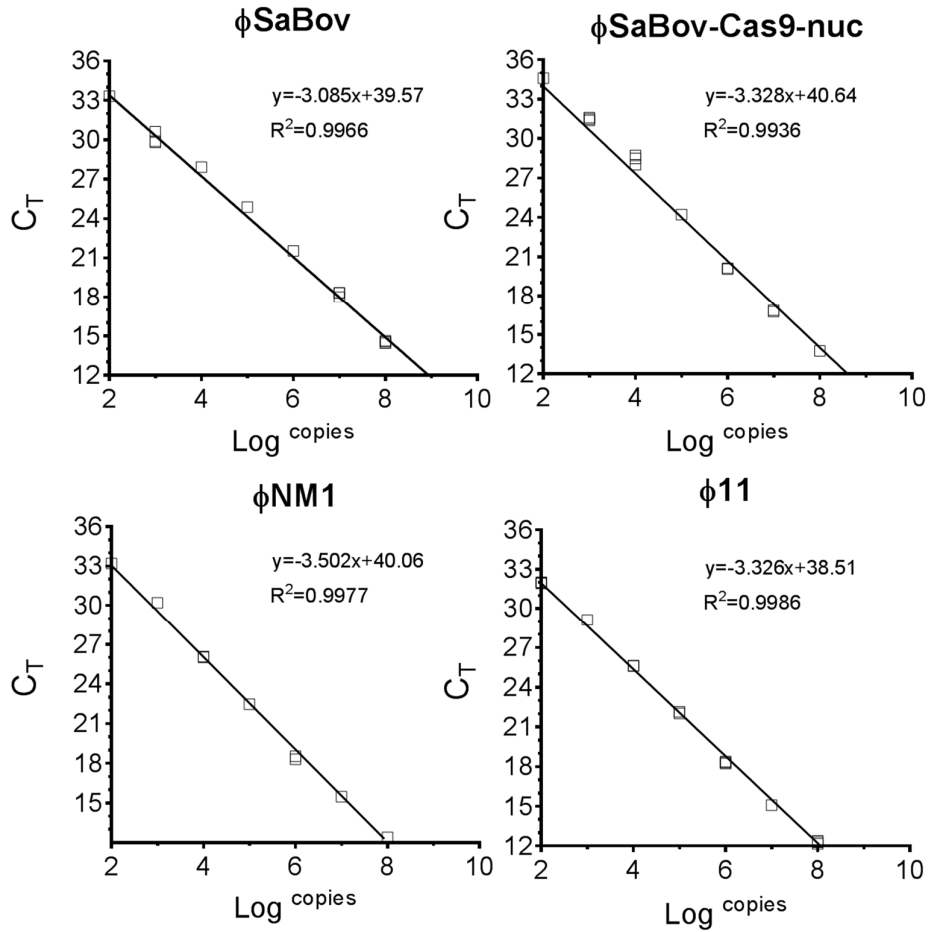

Supplemental Figure S3. Standard curves to determine the absolute copy number of phage DNA. The integrase gene for each phage was amplified and cloned into pCR4-TOPO (Life technologies). A serial dilution of cloned plasmid was used in quantitative real time PCR. Standard curves were generated by linear regression analysis to calculate the slope, intercept, and correlation coefficient ( $R^2$ ) using Microcal OriginPro (Microcal origin, Version 7.5).

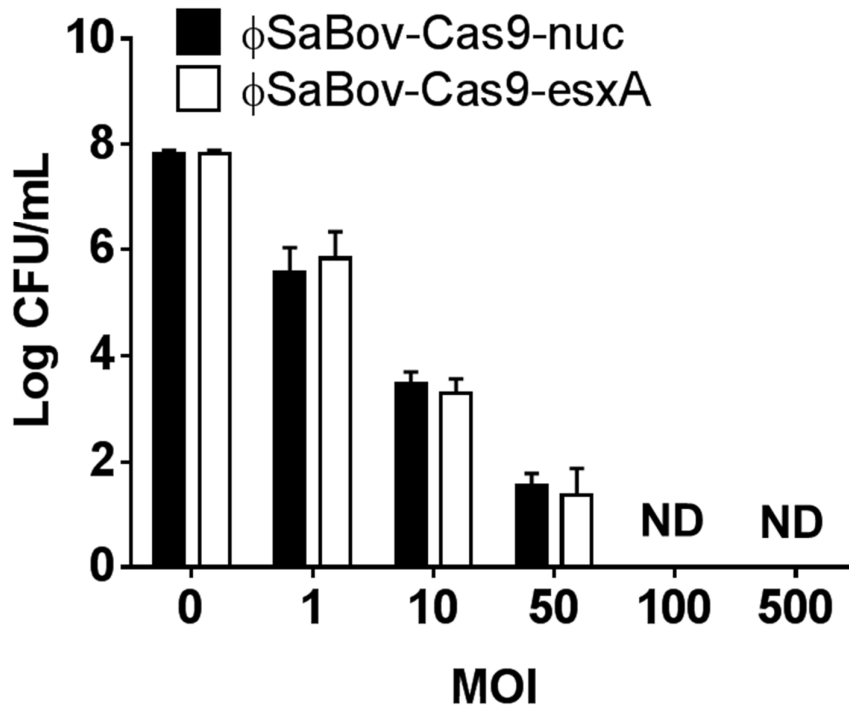

Supplemental Figure S4. The efficacy of  $\phi$ SaBov-Cas9 system targeting the *esxA* gene ( $\phi$ SaBov-Cas9-esxA). A mid exponential culture of *S. aureus* strain CTH96 ( $1 \times 10^5$  CFU) was treated at various MOIs of  $\phi$ SaBov-Cas9-nuc or  $\phi$ SaBov-Cas9-esxA for 6h. Viable cells were recovered on BHI plates. Data point represent the average of triple measurements which were repeated in three independent experiments. The killing efficacy of  $\phi$ SaBov-Cas9-esxA was not significantly different from  $\phi$ SaBov-Cas9-nuc in the student t-test. ND indicates no viable cell was detected.

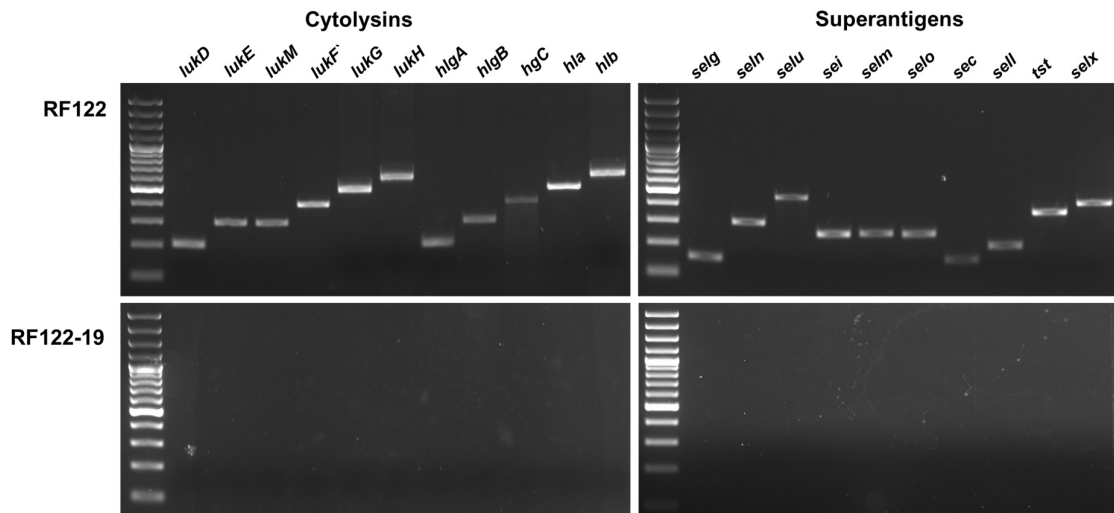

Supplemental Figure S5. PCR analysis of cytolysins and superantigens genes. The strain RF122 harbors 11 cytolysins (*hla*, *hnb*, *hlgA*, *hlgB*, *hlgC*, *lukD*, *lukE*, *lukG*, *lukH*, *lukM*, *lukF*) and 10 superantigens (*sec*, *seg*, *sei*, *selm*, *seln*, *selo*, *selu*, *sell*, *tst1*, *selx*) gene in the chromosome (RF122 panel). The 11 cytolysin and 10 superantigen genes were removed from RF122 chromosome without antibiotic selection markers by allelic exchange using modified pMAD-secY system which was confirmed by PCR analysis (RF122-19 panel).

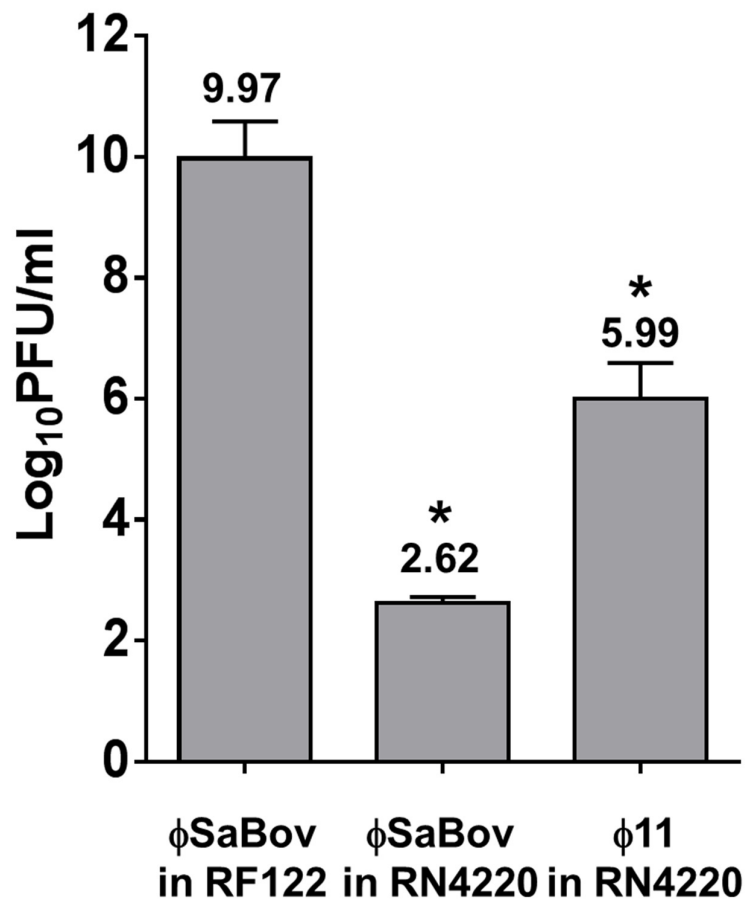

Supplemental Figure S6. The  $\phi$ SaBov lysogenized in the RF122 and RN4220 strains were induced and the number of transducing phage particles of in the phage lysates was determined by calculating the plaque forming unit (PFU) using semi-solid agar overlay method. The bar graph indicates the average and SEM combined from triple measurements of three independent experiments (n=9). Asterisk indicates statistical significance in student *t*-test, compared to the results from  $\phi$ 11 ( $p < 0.001$ ).

## Reference

- 1 Herron-Olson, L., Fitzgerald, J. R., Musser, J. M. & Kapur, V. Molecular correlates of host specialization in *Staphylococcus aureus*. *PloS one* **2**, e1120, doi:10.1371/journal.pone.0001120 (2007).
- 2 Joo, Y. S., Fox, L. K., Davis, W. C., Bohach, G. A. & Park, Y. H. *Staphylococcus aureus* associated with mammary glands of cows: genotyping to distinguish different strains among herds. *Veterinary microbiology* **80**, 131-138 (2001).
- 3 McDougal, L. K. *et al.* Pulsed-field gel electrophoresis typing of oxacillin-resistant *Staphylococcus aureus* isolates from the United States: establishing a national database. *Journal of clinical microbiology* **41**, 5113-5120 (2003).
- 4 Moon, B. Y. *et al.* Phage-mediated horizontal transfer of a *Staphylococcus aureus* virulence-associated genomic island. *Scientific reports* **5**, 9784, doi:10.1038/srep09784 (2015).
- 5 Baba, T. *et al.* Genome and virulence determinants of high virulence community-acquired MRSA. *Lancet (London, England)* **359**, 1819-1827 (2002).
- 6 Sullivan, M. A., Yasbin, R. E. & Young, F. E. New shuttle vectors for *Bacillus subtilis* and *Escherichia coli* which allow rapid detection of inserted fragments. *Gene* **29**, 21-26 (1984).
